# Supplementary material
Source: PubMed Central journal article supplement (PMC6005180)
Supplement: NIHMS920648-supplement-1.pdf [file NIHMS920648-supplement-1.pdf]

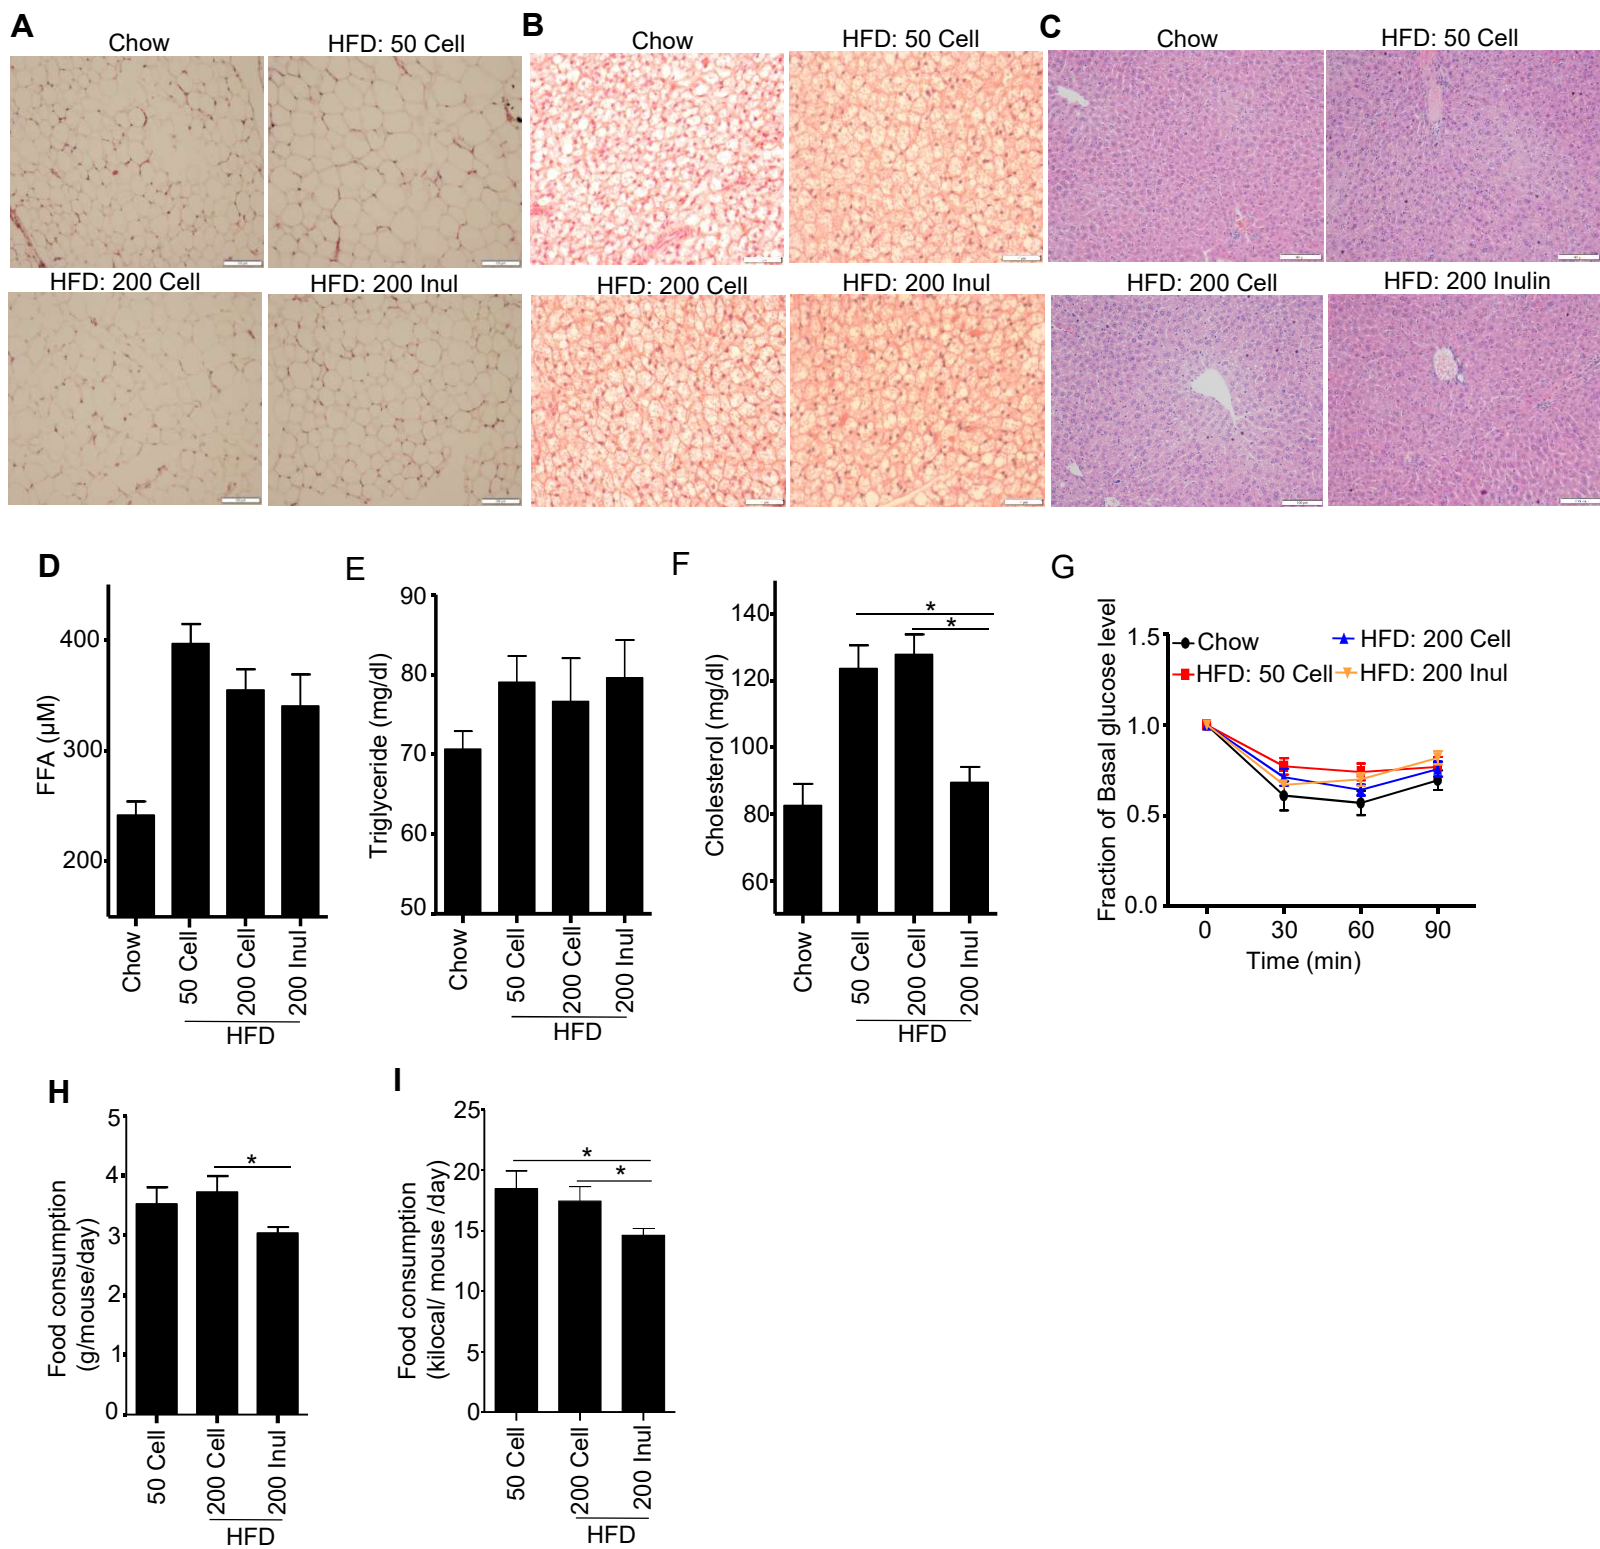

**Figure S1, related to figure 1. Effect of inulin on HFD induced metabolic disease.** C57BL/6 male mice were fed chow, HFD, or HFD supplemented with cellulose or inulin for 4 weeks (n=5). A-C) Epididymal adipose tissue (A), Brown adipose tissue (B) and liver (C) were stained with H&E, and representative images were showed. Scale bars, 100  $\mu\text{m}$  (A), 50 $\mu\text{m}$  (B), 100  $\mu\text{m}$  (C). D-F) Free fatty acid (FFA), triglycerides and cholesterol were measured in serum of mice at day 28 post diets treatment. G) The decrease in glucose level relative to basal glucose level after insulin injection was calculated. H-I) the food intake was measured. Data were expressed as mean  $\pm$  SEM. Statistical significance was assessed by unpaired Student t test.

\* $p < 0.05$ ; \*\* $p < 0.01$ .

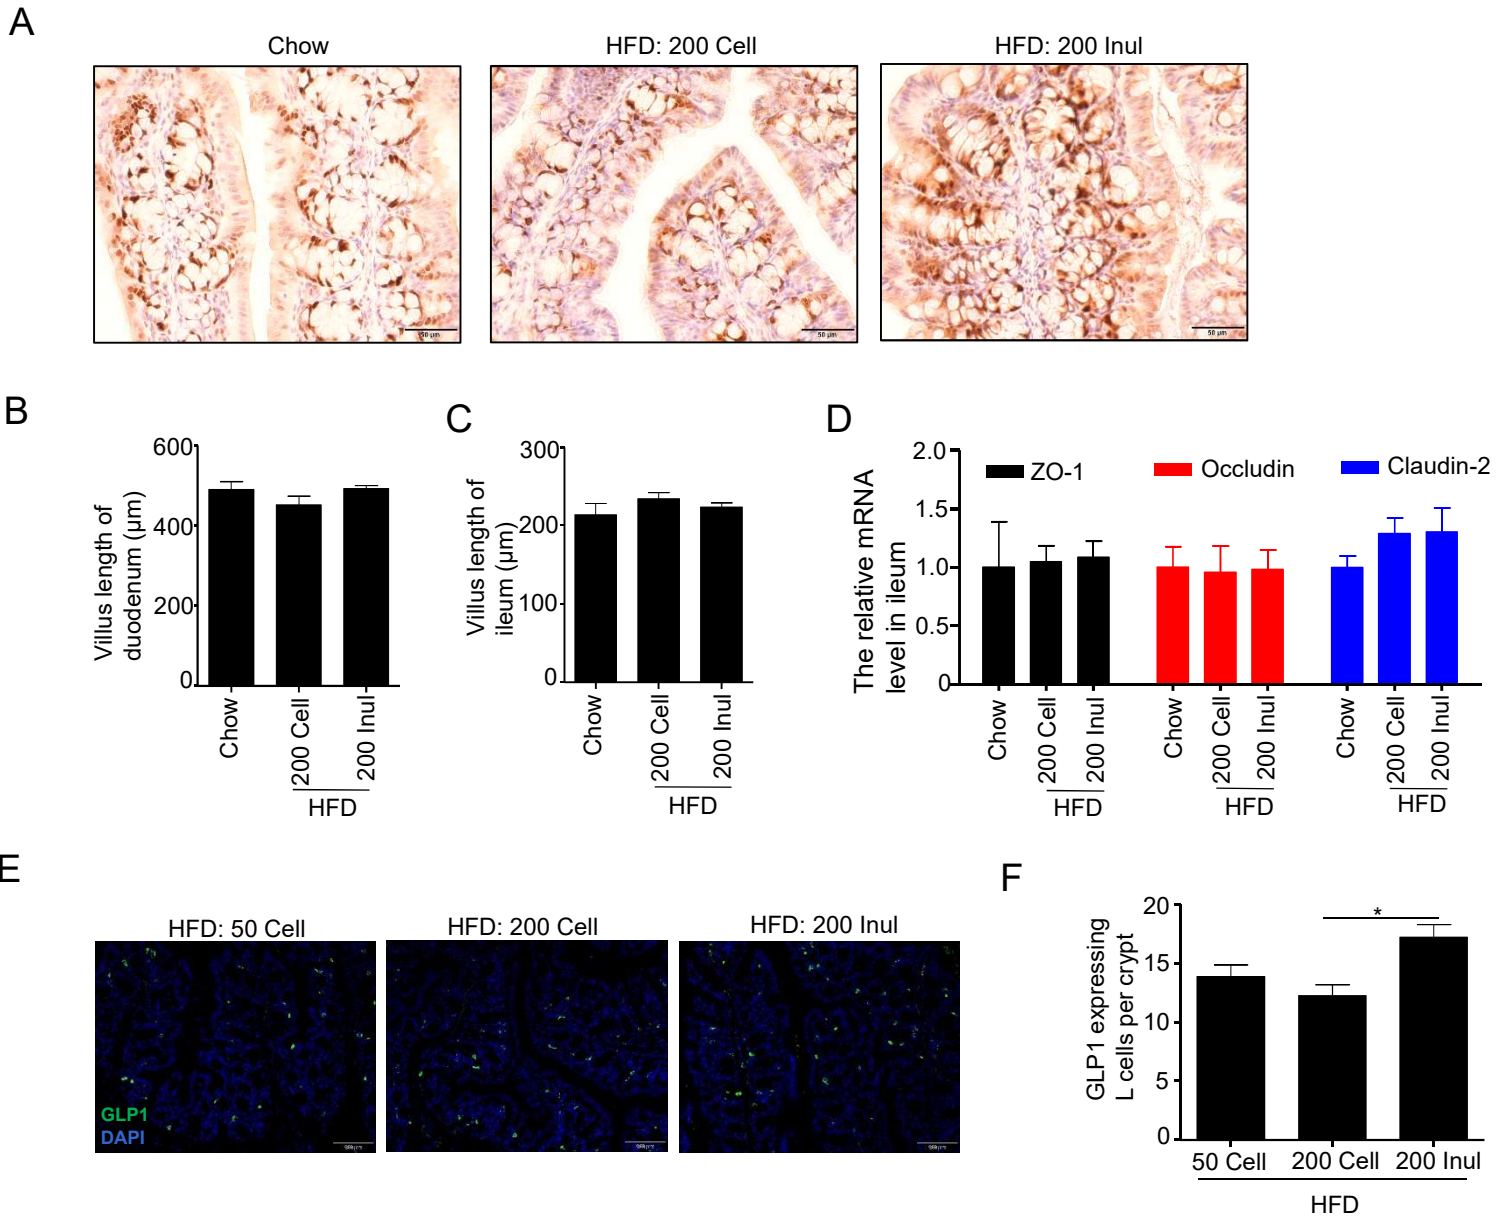

**Figure S2, related to figure 2. Extended analysis of the effect of HFD supplemented with cellulose or inulin on intestine.**

A) The colon was stained with PCNA. Representative images are shown. Scale bars, 50 µm. B-C. The small intestine including duodenum and ileum was stained by HE, the villus length in duodenum (B) and ileum (C) was measured. D) The mRNA was extracted from ileum, and the expression of ZO-1, Occludin and Claudin-2 was analyzed by RT-PCR. E-F) The proximal colon was stained with GLP1 (E), and GLP1 positive cells were counted (F). Scale bars, 50 µm. Data were expressed as mean ± SEM. Statistical significance was assessed by unpaired Student t test. \*p<0.05.

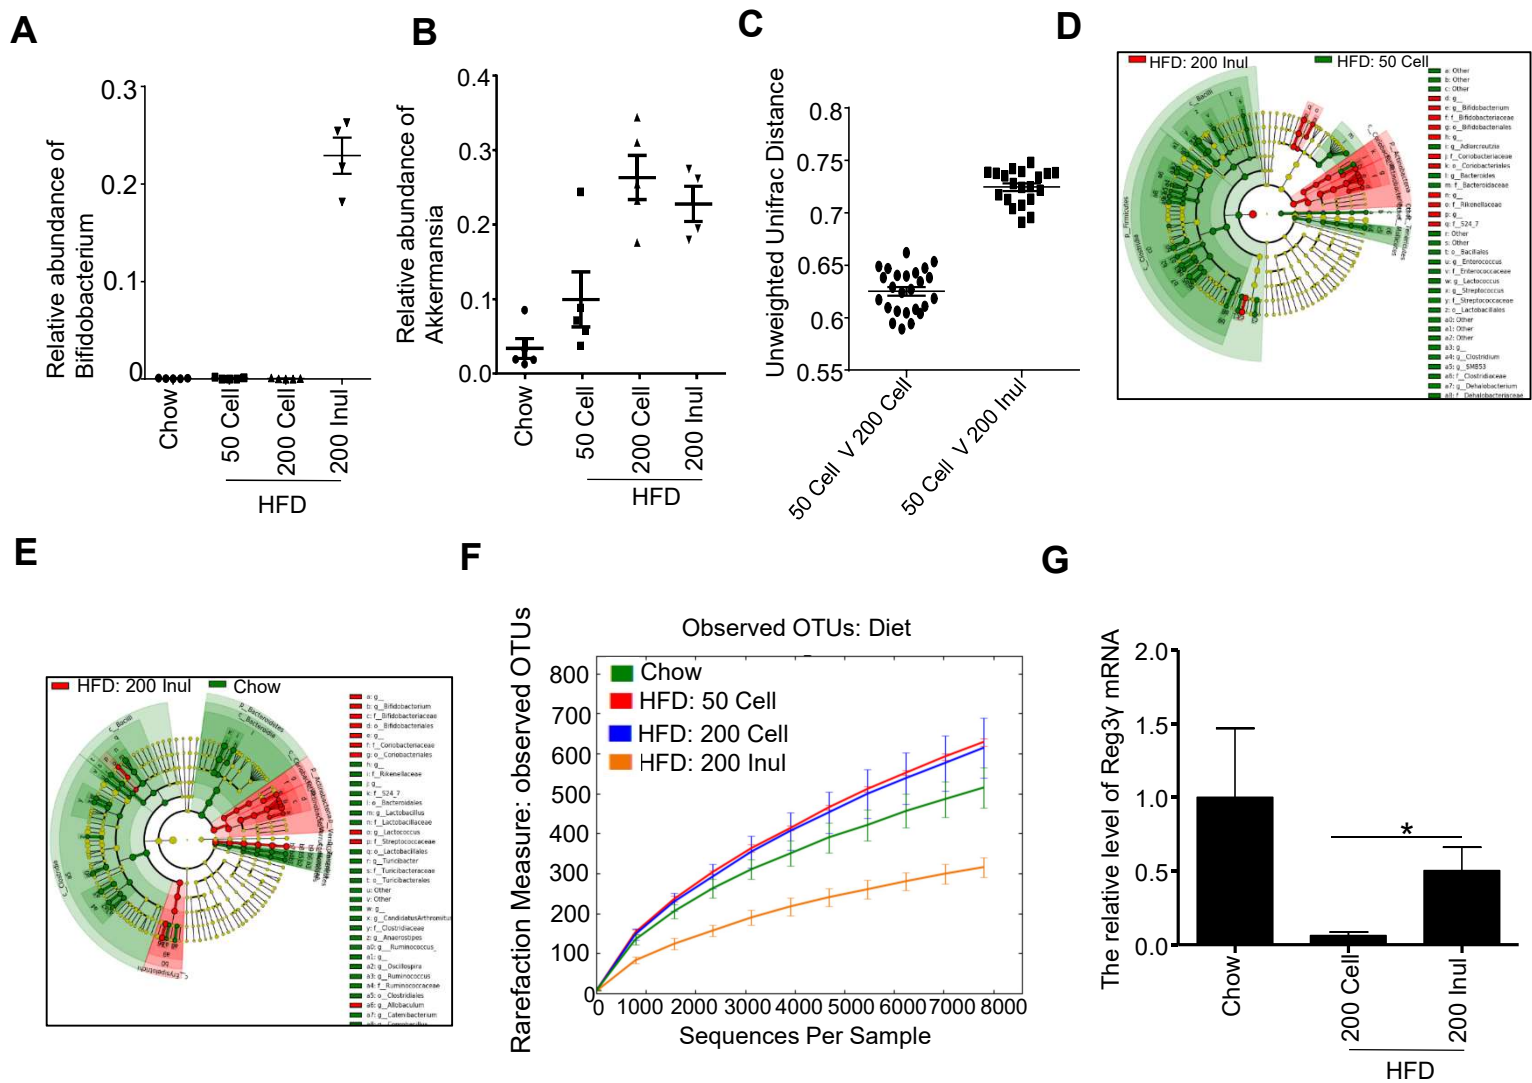

**Figure S3, related to figure 3. Extended analysis of HFD and its enrichment with cellulose or inulin impact microbiota composition.** A-B) The relative abundance of Bifidobacteria and Akkermansia in feces was analyzed by 16S rRNA gene sequence. C) Principal component analysis of the Unifrac distance. D-E) Taxonomic cladogram obtained from LefSe analysis of 16S sequences by comparing HFD enrichment of Inulin with standard HFD (D) or chow (E). F) Rarefaction curves comparing the species richness (observed OTU number) during different diets treatment. G) Quantitation of Reg3γ in epithelial cells by RT-PCR. Data were expressed as mean ± SEM. Statistical significance was assessed by unpaired Student t test. \*p<0.05.

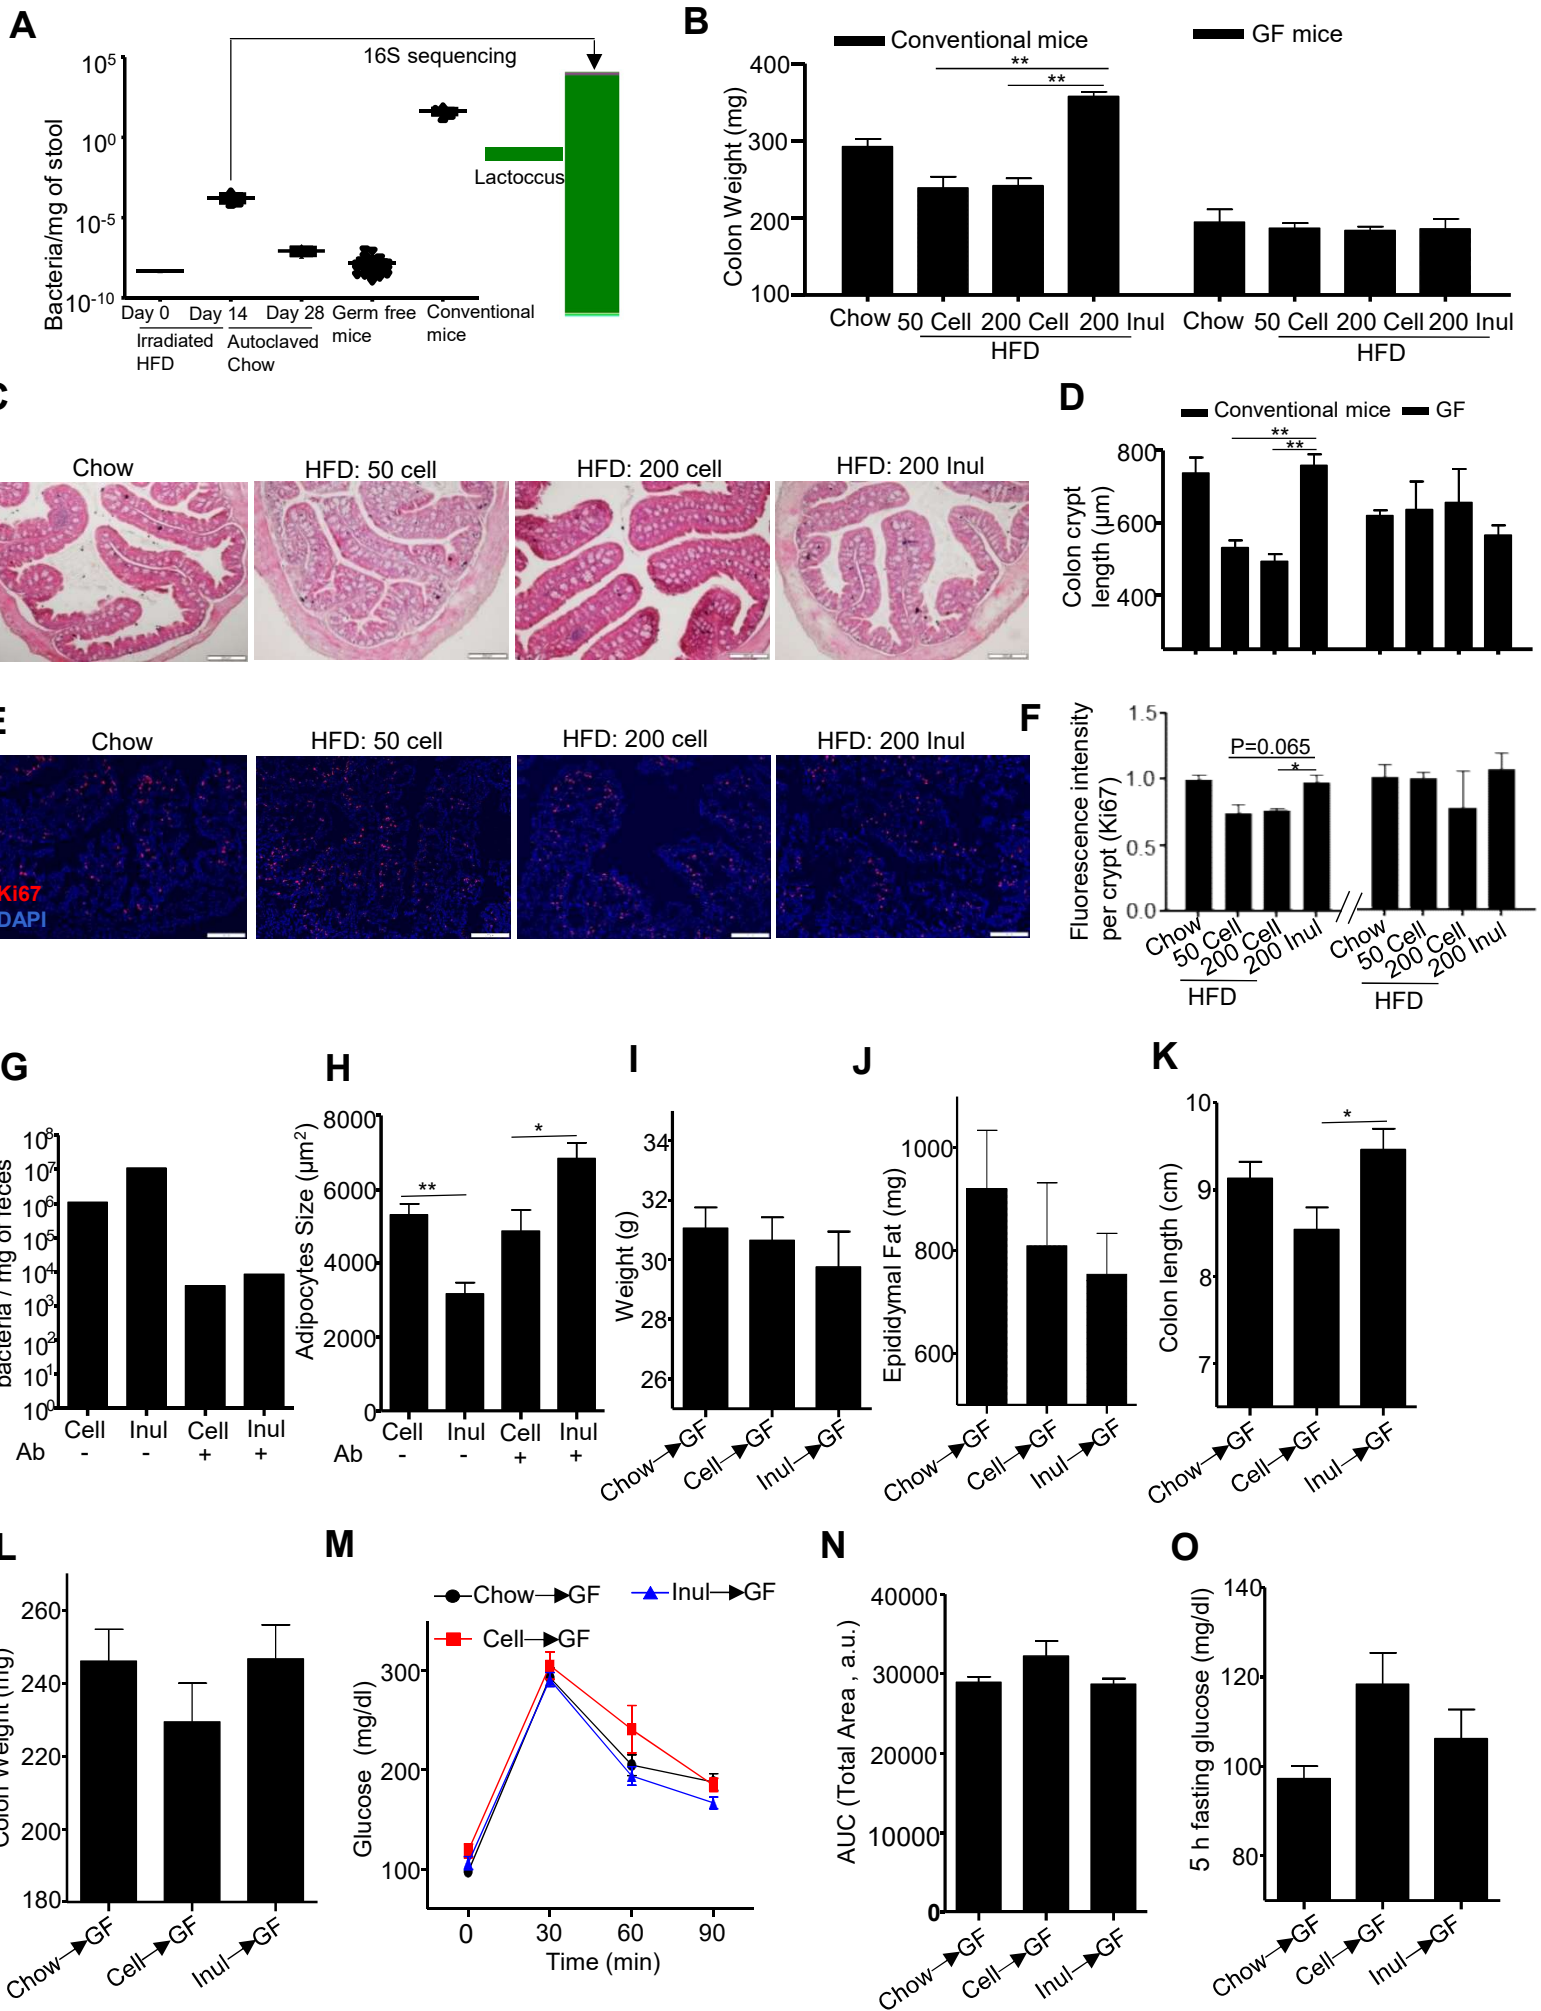



**Figure S4, related to figure 4. Extended analysis of the role of microbiota in inulin induced beneficial effects.** A) Swiss Webster GF mice were treated with irradiated HFD diet for 14 days, and were switched to autoclaved chow diet for 14 days, bacteria in the feces were measured by qPCR, and conventional mice were used as positive control. The DNA was extracted from feces of mice fed with irradiated HFD for 14 days, and was subjected to 16S rRNA gene sequences: Green = Firmicutes Bacilli, Lactobacillales Streptococcaceae Lactococcus. B-F) Conventional and germfree (GF) Swiss Webster mice (n=3-5) were treated with HFD, or HFD supplemented with cellulose or inulin. B) Colon mass. C) Representative colon histopathologic appearance by H&E staining in GF mice. Scale bars, 200  $\mu$ m. D) Colon crypt length in conventional and GF mice. E) Representative images of colon stained by Ki67 in GF mice. F) Quantification of cell proliferation in colon assessed by Ki67 levels. G-H) C57BL/6 male mice were fed HFD supplemented with cellulose (HFD-200 Cell) or inulin (HFD-200 Inul) with or without antibiotic cocktail in drink water. The feces at day 6 post antibiotic treatment were collected to measure bacteria by qPCR (G), and the epididymal fat at the end of experiment was stained with H&E, adipocyte size was determined (H). I-O) Swiss Webster GF mice (n=3-5) were transplanted with microbiota from mice fed chow, or HFD enriched with cellulose or inulin. Transplanted mice were fed chow for 28 days. I) Body weight. J) Epididymal fat. K) Colon length. L) Colon weight. M-N) Glucose tolerance was measured (M) and area under curve (AUC) calculated (N). O) 5 h fasting glucose. Data were expressed as mean  $\pm$  SEM. Statistical significance was assessed by unpaired Student t test. \* $p < 0.05$ ; \*\* $p < 0.01$ .

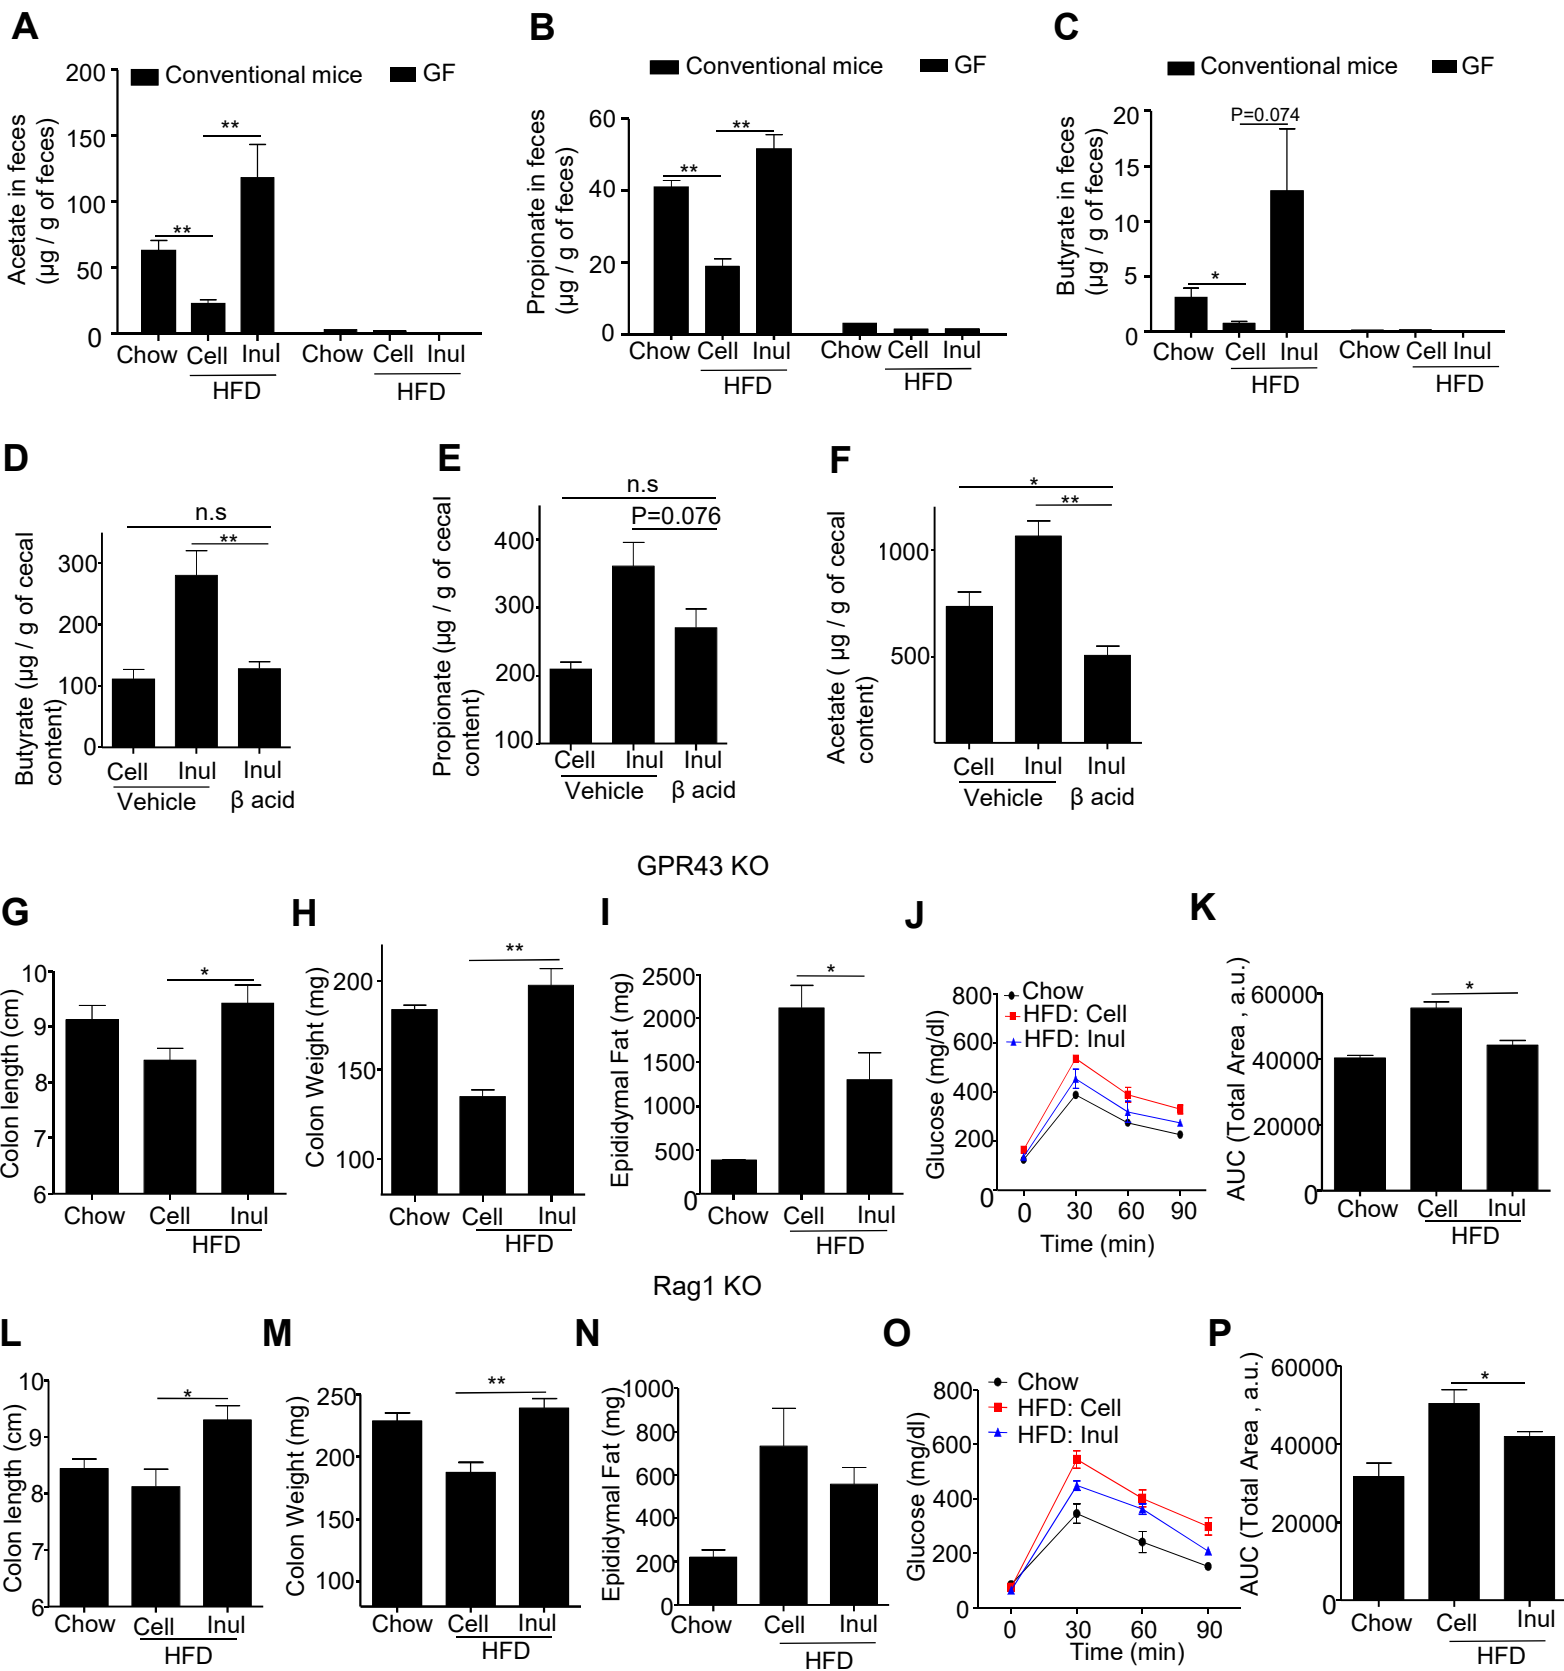

**Figure S5, related to figure 5. Prevention of metabolic syndrome by inulin does not require GPR43 or T and B**

**lymphocytes.** A-C) Feces samples from GF and conventional mice, which were fed chow, HFD supplemented with cellulose (HFD-200 Cell) or inulin (HFD-200 Inul), were used to analyze SCFA including acetate, propionate, and butyrate. D-F) C57BL/6 male mice (n=5) were fed HFD supplemented with cellulose (HFD-200 Cell) or inulin (HFD-200 Inul) with drink water containing  $\beta$  acid or vehicle for 4 weeks. The cecal content (n=5) was extract to measure the concentration of SCFA including butyrate, propionate and acetate. G-K) GPR43 KO (n=4) mice were treated with chow, HFD supplemented with cellulose (HFD-200 Cell) or inulin (HFD-200 Inul) for 4 weeks. G) Colon length. H) Colon weight. I) Epididymal fat pad. J-K). Glucose tolerance was measured (J) and area under curve (AUC) calculated (K). L-P) Rag1 KO mice were fed chow, HFD supplemented with cellulose (HFD-200 Cell) or inulin (HFD-200 Inul) for 4 weeks. L) The colon length. M) Colon weight. N) Epididymal fat pad. O-P) Glucose tolerance test. Data were expressed as mean  $\pm$  SEM. Statistical significance was assessed by unpaired Student t test. \*p<0.05; \*\*p<0.01; n.s, not significance.

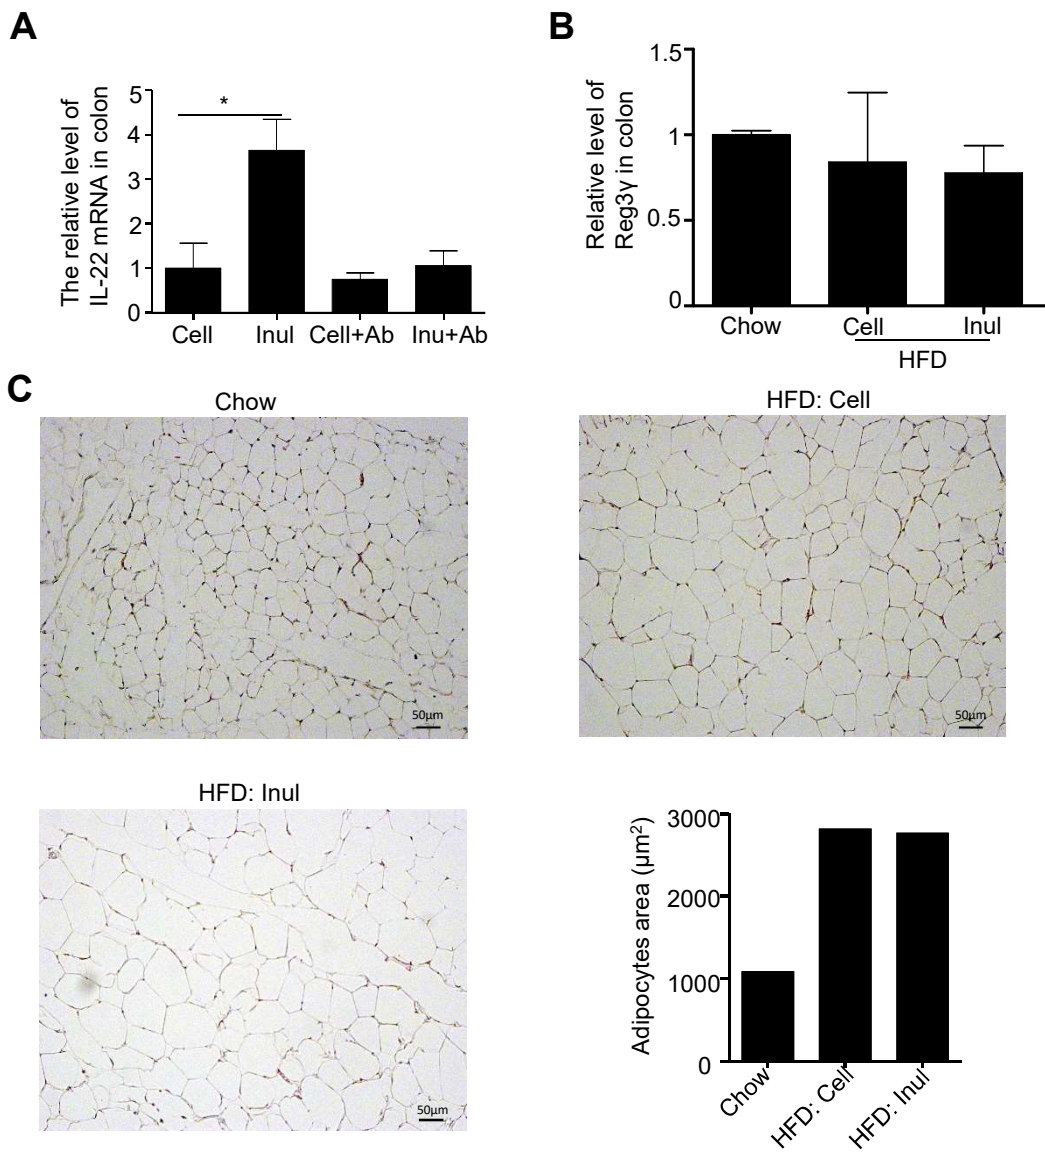

**Figure S6, related to figure 6. Extended analysis of the role of IL-22 during inulin treatment in metabolic syndrome induced by HFD** A) mRNA was extracted from transverse colons of mice fed HFD supplemented with cellulose or inulin wherein drinking with water containing, or lacking, antibiotics (Ab). Expression level of IL-22 was analyzed by qRT-PCR. B) Quantitation of Reg3γ in colon of GF mice by qRT-PCR. C) Epididymal adipose of IL-22KO mice was stained with hematoxylin-eosin, the cell size of adipose tissue was calculated by using image J. Data were expressed as mean ± SEM. Statistical significance was assessed by unpaired Student t test. \*p<0.05.



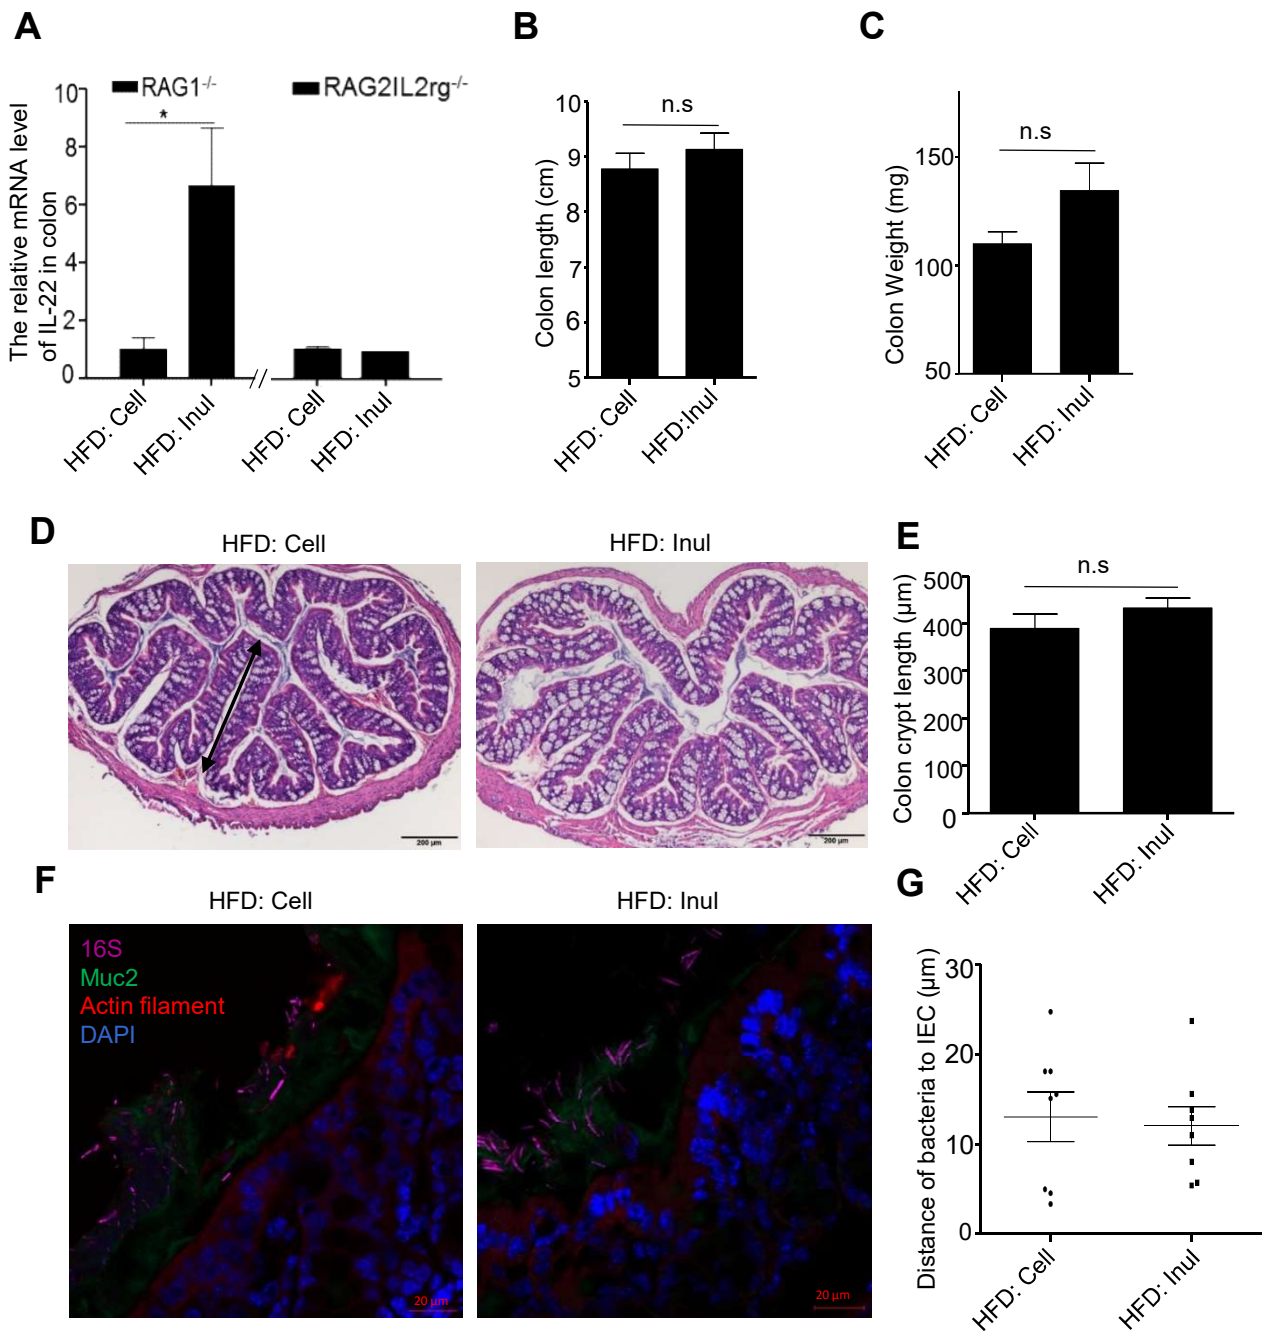

**Figure S7, related to figure 6. Loss of inulin-induced IL-22 expression in colon and ablation of inulin's beneficial effects in RAG2IL2rg<sup>-/-</sup> mice.** RAG2IL2rg<sup>-/-</sup> mice (n=5) were fed with HFD supplemented cellulose (HFD-200 Cell) or inulin (HFD-200 Inul) for 6 days. A) mRNA was extracted from transverse colon and used to measure IL-22 expression by qRT-PCR. B) Colon length. C) Colon weight. D-E) The proximal colon was stained by HE (D), and crypt length (shown as a double-headed arrow) was measured (E). F-G) The transverse colon was fixed in carnoy solution, and microbiota localization in colon was analyzed by immunohistochemical staining (F), Bacterial vs epithelial distance was quantified (G). Data were expressed as mean ± SEM. Statistical significance \*p<0.05; n.s, not significance.

Table S1. The composition of the purified diets used in this study. Related to STAR Methods and Fig. 1

| Product #                | D12492             |       | D13081106           |       | D13081107           |       |
|--------------------------|--------------------|-------|---------------------|-------|---------------------|-------|
|                          | <i>HFD-50 Cell</i> |       | <i>HFD-200 Inul</i> |       | <i>HFD-200 Cell</i> |       |
|                          | gm%                | kcal% | gm%                 | kcal% | gm%                 | kcal% |
| Protein                  | 26                 | 20    | 23                  | 20    | 22                  | 20    |
| Carbohydrate             | 26                 | 20    | 40                  | 20    | 22                  | 20    |
| Fat                      | 35                 | 60    | 31                  | 60    | 29                  | 60    |
| Total                    |                    | 100   |                     | 100   |                     | 100   |
| kcal/gm                  | 5.2                |       | 4.6                 |       | 4.4                 |       |
| Ingredient               | gm                 | kcal  | gm                  | kcal  | gm                  | kcal  |
| Casein                   | 200                | 800   | 200                 | 800   | 200                 | 800   |
| L-Cystine                | 3                  | 12    | 3                   | 12    | 3                   | 12    |
| Corn Starch              | 0                  | 0     | 0                   | 0     | 0                   | 0     |
| Maltodextrin 10          | 125                | 500   | 75                  | 300   | 125                 | 500   |
| Sucrose                  | 68.8               | 275   | 68.8                | 275   | 68.8                | 275   |
| Cellulose, BW200         | 50                 | 0     | 0                   | 0     | 200                 | 0     |
| Inulin, Orafti HP        | 0                  | 0     | 200                 | 200   | 0                   | 0     |
| Soybean Oil              | 25                 | 225   | 25                  | 225   | 25                  | 225   |
| Lard                     | 245                | 2205  | 245                 | 2205  | 245                 | 2205  |
| Mineral Mix, S10026      | 10                 | 0     | 10                  | 0     | 10                  | 0     |
| DiCalcium Phosphate      | 13                 | 0     | 13                  | 0     | 13                  | 0     |
| Calcium Carbonate        | 5.5                | 0     | 5.5                 | 0     | 5.5                 | 0     |
| Potassium Citrate, 1 H2O | 16.5               | 0     | 16.5                | 0     | 16.5                | 0     |
| Vitamin Mix, V10001      | 10                 | 40    | 10                  | 40    | 10                  | 40    |
| Choline Bitartrate       | 2                  | 0     | 2                   | 0     | 2                   | 0     |
| FD&C Yellow Dye #5       | 0                  | 0     | 0                   | 0     | 0                   | 0     |
| FD&C Red Dye #40         | 0                  | 0     | 0.05                | 0     | 0.025               | 0     |
| FD&C Blue Dye #1         | 0.05               | 0     | 0                   | 0     | 0.025               | 0     |
| Total                    | 773.85             | 4057  | 873.85              | 4057  | 923.85              | 4057  |

| Table S2. Key Resource Table supplemental oligonucleotides. Related to Key Resource Table                                                                                                   |            |            |
|---------------------------------------------------------------------------------------------------------------------------------------------------------------------------------------------|------------|------------|
| OLIGONUCLEOTIDES                                                                                                                                                                            | SOURCE     | IDENTIFIER |
| 36B4: 5' TCCAGGCTTTGGGCATCA-3' and 5'CTTTATTCAGCTGCACATCACTCAGA-3'                                                                                                                          | Invitrogen | NA         |
| IL-22: 5'-GTGCTCAACTTCACCCTGGA3' and 5'-TGGATGTTCTGGTCGTCACC-3'                                                                                                                             | Invitrogen | NA         |
| Reg3 $\gamma$ : 5'TTCCTGTCTCCATGATCAAAA-3' and 5'CATCCACCTCTGTTGGGTTC-3'                                                                                                                    | Invitrogen | NA         |
| CXCL1: 5' TTGTGCGAAAAGAAGTGCAG-3' and 5'TACAAACACAGCCTCCACA-3'                                                                                                                              | Invitrogen | NA         |
| IL-6: 5' GTGGCTAAGGACCAAGACCA-3' and 5'GGTTTGCCGAGTAGACCTCA-3'                                                                                                                              | Invitrogen | NA         |
| TNF- $\alpha$ : 5' CGAGTGACAAGCCTGTAGCC-3' and 5'CATGCCGTTGGCCAGGA-3'                                                                                                                       | Invitrogen | NA         |
| ZO-1: 5'ACCCGAAACTGATGCTGTGGATAG-3' and 5'AAATGGCCGGGCAGAACTTGTGTA-3'                                                                                                                       | Invitrogen | NA         |
| Ocludin: 5'ATGTCCGGCCGATGCTCTC-3' and 5'TTTGGCTGCTCTTGGGTCTGTAT-3'                                                                                                                          | Invitrogen | NA         |
| Claudin-2: 5' GTCATCGCCCATCAGAAGAT-3' and 5'ACTGTTGGACAGGGAACCAG-3'                                                                                                                         | Invitrogen | NA         |
| 16S rRNA: 5'-AGAGTTTGATCCTGGCTCAG-3' and 5'-CTGCTGCCTCCCGTAGGAGT-3'                                                                                                                         | Invitrogen | NA         |
| 16S rRNA sequence primers:<br>5'AATGATACGGCGACCACCGAGATCTACACTATGGT<br>AATTGTGTGCCAGCMGCCGCGGTAA-3'; 5'<br>CAAGCAGAAGACGGCATAACGAGATXXXXXXXXXXXX<br>X AGTCAGTCAG CC GGACTACHVGGGTWTCTAAT-3' | Invitrogen | NA         |
| EUB338 probe: 5'-GCTGCCTCCCGTAGGAGT-3', with a 5' labeling using Alexa 647                                                                                                                  | Invitrogen | NA         |
